# Supplementary material
Source: PubMed Central journal article supplement (PMC4832924)

**SUPPLEMENTAL MATERIAL FOR:**

Country-Specific Effects of Climate Variability on Human Migration

Clark Gray<sup>a1</sup> and Erika Wise<sup>a</sup>

<sup>a</sup> Department of Geography, University of North Carolina at Chapel Hill, Chapel Hill, NC 27599

<sup>1</sup> Corresponding author: [cgray@email.unc.edu](mailto:cgray@email.unc.edu)

**Supplement Table 1.** Interactions between climate variability and control variables (incident rate ratios and significance tests).

| Specification                                                    | Predictor            | Effect on migration |          |          |              |         |
|------------------------------------------------------------------|----------------------|---------------------|----------|----------|--------------|---------|
|                                                                  |                      | Kenya               | Uganda   | Nigeria  | Burkina Faso | Senegal |
| N. Climate X<br>primary sector<br>occupation                     | Precipitation        | 1.13                | 1.39 **  | 1.38 *   | 1.23         | 0.96    |
|                                                                  | Temperature          | 0.64 *              | 2.46 *   | 0.71     | 0.29 ***     | 0.93    |
|                                                                  | Precip X primary     | 1.08                | 0.70 *   | 0.76     | 0.62         | 1.06    |
|                                                                  | Temp X primary       | 0.60                | 0.80     | 0.43     | 1.02         | 1.83    |
|                                                                  | Primary sector       | 1.43                | 1.19     | 2.20     | 1.88 *       | 0.93    |
| O. Climate X<br>years of education                               | Precipitation        | 1.10                | 1.48 **  | 1.23     | 0.78         | 0.93    |
|                                                                  | Temperature          | 0.70                | 4.94 *** | 0.23 +   | 0.30 ***     | 1.07    |
|                                                                  | Precip X education   | 1.01                | 0.97 *   | 1.01     | 1.01         | 1.00    |
|                                                                  | Temp X education     | 0.98                | 0.90 **  | 1.12 *   | 0.97         | 1.03    |
|                                                                  | Years of education   | 1.04                | 1.16 **  | 0.93     | 1.16 *       | 0.99    |
|                                                                  | Years of education^2 | 1.00                | 1.00 +   | 1.00     | 0.99 *       | 1.00    |
| P. Climate X<br>migrants prior to<br>2004                        | Precipitation        | 1.18                | 1.12     | 1.27 +   | 0.83         | 0.98    |
|                                                                  | Temperature          | 0.48 ***            | 1.87 +   | 0.53     | 0.28 ***     | 1.03    |
|                                                                  | Precip X prior       | 0.95                | 1.00     | 1.10 *   | 0.95         | 0.93    |
|                                                                  | Temp X prior         | 1.91 ***            | 1.77 *** | 1.30 +   | 1.11         | 1.21    |
|                                                                  | Prior migrants       | 0.63 ***            | 0.54 *** | 0.80 +   | 1.01         | 0.91    |
| Q. Climate X<br>rural location                                   | Precipitation        | 1.23 *              | 1.14     | 1.25 +   | 0.44 ***     | 1.02    |
|                                                                  | Temperature          | 0.59 *              | 3.02 *   | 0.73     | 0.34 *       | 0.99    |
|                                                                  | Precip X rural       | 0.89                | 0.99     | 1.13     | 1.87 *       | 0.87    |
|                                                                  | Temp X rural         | 0.98                | 0.71     | 0.68     | 0.86         | 1.21    |
|                                                                  | Rural location       | 0.99                | 1.51     | 1.18     | 1.16         | 0.97    |
| R. Climate X<br>historical precip<br>less than country<br>median | Precipitation        | 1.18                | 1.07     | 1.81 *** | 0.83         | 1.21    |
|                                                                  | Temperature          | 0.67                | 2.21 *   | 1.91     | 0.31 **      | 2.09    |
|                                                                  | Precip X dry area    | 0.90                | 1.23     | 0.69 *   | 0.90         | 0.73    |
|                                                                  | Temp X dry area      | 0.75                | 1.29     | 0.15 +   | 0.86         | 0.31 *  |

Results from negative binomial regressions at the household-year level of the number of departed migrants. Additional  
+ p<0.10, \* p<0.05, \*\* p<0.01, \*\*\* p<0.001

**Supplement Table 2.** Full results for Kenya by specification (incident rate ratios and significance tests).

| Predictor                                 | A        | B        | C        | D        | E        | F        | G         | H        | I        | J        | K        | L        | M        |
|-------------------------------------------|----------|----------|----------|----------|----------|----------|-----------|----------|----------|----------|----------|----------|----------|
| <b>Climate variables</b>                  |          |          |          |          |          |          |           |          |          |          |          |          |          |
| CRU anomalies, years 0-1, precipitation   | 1.15     |          |          |          |          | 1.14     | 1.58 *    | 1.22 +   | 0.88     | 1.09     | 1.25     | 1.13     | 1.15     |
| CRU anomalies, years 0-1, temperature     | 0.58 **  |          |          |          |          | 0.58 **  | 0.02 ***  | 0.55 **  | 0.76     | 0.53 *   | 0.63     | 0.50 **  | 0.72     |
| CRU raw values, years 0-1, precipitation  |          | 1.06     | 1.16 **  |          |          |          |           |          |          |          |          |          |          |
| CRU raw values, years 0-1, temperature    |          | 0.93 *   | 0.91 *   |          |          |          |           |          |          |          |          |          |          |
| CRU raw values, years 0-1, precip. timing |          |          | 1.37 **  |          |          |          |           |          |          |          |          |          |          |
| MERRA anomalies, years 0-1, precipitation |          |          |          | 0.98     |          |          |           |          |          |          |          |          |          |
| MERRA anomalies, years 0-1, temperature   |          |          |          | 0.77 **  |          |          |           |          |          |          |          |          |          |
| CRU anomalies, years 0-3, precipitation   |          |          |          |          | 0.87     |          |           |          |          |          |          |          |          |
| CRU anomalies, years 0-3, temperature     |          |          |          |          | 0.21 *** |          |           |          |          |          |          |          |          |
| CRU anomalies, years 0-1, precip. squared |          |          |          |          |          |          | 1.00      |          |          |          |          |          |          |
| CRU anomalies, years 0-1, temp. squared   |          |          |          |          |          |          | 11.59 *** |          |          |          |          |          |          |
| CRU anomalies, years 0-1, precip. X temp. |          |          |          |          |          |          | 0.68      |          |          |          |          |          |          |
| <b>Controls</b>                           |          |          |          |          |          |          |           |          |          |          |          |          |          |
| Female                                    | 1.24 *   | 1.24 *   | 1.24 *   | 1.24 +   | 1.24 +   | 1.24 *   | 1.24 +    | 1.28 +   | 1.07     | 1.43 *   | 0.94     | 1.20     | 1.25     |
| Age                                       | 1.07 *** | 1.07 *** | 1.07 *** | 1.07 *** | 1.07 *** | 1.07 *** | 1.07 ***  | 1.10 *** | 1.01     | 1.05 *   | 1.09 **  | 1.07 **  | 1.07 +   |
| Age squared                               | 1.00 **  | 1.00 **  | 1.00 **  | 1.00 **  | 1.00 **  | 1.00 **  | 1.00 **   | 1.00 *** | 1.00     | 1.00     | 1.00 *   | 1.00 *   | 1.00 +   |
| Born in rural area                        | 1.00     | 1.00     | 1.00     | 1.00     | 1.00     | 1.00     | 1.00      | 1.12     | 0.82     | 1.05     | 0.97     | 0.92     | 1.12     |
| Years of education                        | 1.02     | 1.02     | 1.02     | 1.02     | 1.02     | 1.02     | 1.02      | 1.04     | 1.00     | 1.02     | 1.02     | 1.03     | 1.01     |
| Years of education squared                | 1.00     | 1.00     | 1.00     | 1.00     | 1.00     | 1.00     | 1.00      | 1.00     | 1.00     | 1.00     | 1.00     | 1.00     | 1.00     |
| Primary sector occupation                 | 0.95     | 0.95     | 0.95     | 0.95     | 0.95     | 0.95     | 0.95      | 0.99     | 0.81     | 0.89     | 0.99     | 0.83     | 1.15     |
| Number of children (<15 years old)        | 1.08 *   | 1.07 *   | 1.08 *   | 1.08 *   | 1.08 *   | 1.07 *   | 1.08 *    | 1.12 **  | 0.95     | 1.08 **  | 1.10     | 1.07 **  | 1.08     |
| Number of adult men                       | 1.56 *** | 1.56 *** | 1.56 *** | 1.56 *** | 1.56 *** | 1.56 *** | 1.56 ***  | 1.59 *** | 1.53 *** | 1.91 *** | 1.12 +   | 1.58 *** | 1.51 *** |
| Number of adult women                     | 1.54 *** | 1.54 *** | 1.54 *** | 1.54 *** | 1.55 *** | 1.55 *** | 1.54 ***  | 1.56 *** | 1.56 *** | 1.05     | 2.24 *** | 1.43 *** | 1.72 *** |
| Migrants prior to 2004                    | 1.08     | 1.08     | 1.08     | 1.08     | 1.08     | 1.08     | 1.08      | 1.12     | 0.97     | 1.01     | 1.13 *   | 1.13 *   | 1.03     |
| Rural location                            | 0.98     | 0.98     | 0.98     | 0.98     | 0.98     | 0.98     | 0.98      | 0.95     | 0.99     | 1.00     | 1.04     | 1.34 *   | 0.58 *** |
| Year                                      | 1.37 **  | 1.42 *** | 1.43 *** | 1.54 *** | 1.52 *** |          | 1.73 ***  | 1.32 **  | 1.66 **  | 1.35 +   | 1.43 *   | 1.31 *   | 1.48 **  |
| Year squared                              | 0.95 *   | 0.94 **  | 0.94 **  | 0.93 *** | 0.96 *   |          | 0.90 ***  | 0.96 +   | 0.92 *   | 0.96     | 0.95     | 0.96     | 0.94 *   |

Results from negative binomial regressions at the household-year level of the number of departed migrants. Missing indicators and fixed effects are included but not shown.

+ p<0.10, \* p<0.05, \*\* p<0.01, \*\*\* p<0.001

**Supplement Table 3.** Full results for Uganda by specification (incident rate ratios and significance tests).

| Predictor                                 | A        | B        | C        | D        | E        | F        | G        | H        | I        | J        | K        | L        | M        |
|-------------------------------------------|----------|----------|----------|----------|----------|----------|----------|----------|----------|----------|----------|----------|----------|
| <b>Climate variables</b>                  |          |          |          |          |          |          |          |          |          |          |          |          |          |
| CRU anomalies, years 0-1, precipitation   | 1.13     |          |          |          |          | 1.28 **  | 1.12     | 1.14     | 1.02     | 1.04     | 1.26     | 0.94     | 1.38 *   |
| CRU anomalies, years 0-1, temperature     | 2.23 **  |          |          |          |          | 1.15     | 0.09     | 2.11 *   | 2.24     | 1.69     | 2.97 *   | 1.07     | 4.88 *** |
| CRU raw values, years 0-1, precipitation  |          | 1.07     | 1.08     |          |          |          |          |          |          |          |          |          |          |
| CRU raw values, years 0-1, temperature    |          | 1.13 **  | 1.14 **  |          |          |          |          |          |          |          |          |          |          |
| CRU raw values, years 0-1, precip. timing |          |          | 1.08     |          |          |          |          |          |          |          |          |          |          |
| MERRA anomalies, years 0-1, precipitation |          |          |          | 1.12     |          |          |          |          |          |          |          |          |          |
| MERRA anomalies, years 0-1, temperature   |          |          |          | 1.22 +   |          |          |          |          |          |          |          |          |          |
| CRU anomalies, years 0-3, precipitation   |          |          |          |          | 0.95     |          |          |          |          |          |          |          |          |
| CRU anomalies, years 0-3, temperature     |          |          |          |          | 0.90     |          |          |          |          |          |          |          |          |
| CRU anomalies, years 0-1, precip. squared |          |          |          |          |          |          | 1.09     |          |          |          |          |          |          |
| CRU anomalies, years 0-1, temp. squared   |          |          |          |          |          |          | 5.66     |          |          |          |          |          |          |
| CRU anomalies, years 0-1, precip. X temp. |          |          |          |          |          |          | 0.95     |          |          |          |          |          |          |
| <b>Controls</b>                           |          |          |          |          |          |          |          |          |          |          |          |          |          |
| Female                                    | 1.06     | 1.06     | 1.06     | 1.06     | 1.06     | 1.06     | 1.06     | 1.10     | 0.89     | 1.30 *   | 0.81 +   | 1.42 **  | 0.71 *   |
| Age                                       | 1.00     | 1.00     | 1.00     | 1.00     | 1.00     | 1.00     | 1.00     | 1.01     | 0.94     | 0.99     | 1.01     | 0.99     | 1.02     |
| Age squared                               | 1.00     | 1.00     | 1.00     | 1.00     | 1.00     | 1.00     | 1.00     | 1.00     | 1.00     | 1.00     | 1.00     | 1.00     | 1.00     |
| Born in rural area                        | 0.91     | 0.91     | 0.91     | 0.91     | 0.91     | 0.91     | 0.91     | 0.96     | 0.83     | 1.03     | 0.69 *   | 1.12     | 0.69 +   |
| Years of education                        | 1.04 +   | 1.04 +   | 1.04 +   | 1.04 +   | 1.04 +   | 1.04 +   | 1.04 +   | 1.07 *   | 0.98     | 1.02     | 1.06     | 1.04     | 1.04     |
| Years of education squared                | 1.00     | 1.00     | 1.00     | 1.00     | 1.00     | 1.00     | 1.00     | 1.00 **  | 1.00 *   | 1.00     | 1.00     | 1.00     | 1.00     |
| Primary sector occupation                 | 0.95     | 0.95     | 0.96     | 0.95     | 0.95     | 0.95     | 0.95     | 0.87     | 1.64     | 1.04     | 0.79 +   | 1.10     | 0.82     |
| Number of children (<15 years old)        | 1.11 *** | 1.11 *** | 1.11 *** | 1.11 *** | 1.11 *** | 1.11 *** | 1.11 *** | 1.13 *** | 0.95     | 1.09 *** | 1.15 *** | 1.03     | 1.19 *** |
| Number of adult men                       | 1.41 *** | 1.41 *** | 1.41 *** | 1.41 *** | 1.41 *** | 1.41 *** | 1.41 *** | 1.40 *** | 1.45 *** | 1.84 *** | 0.95     | 1.74 *** | 1.05     |
| Number of adult women                     | 1.51 *** | 1.50 *** | 1.51 *** | 1.50 *** | 1.50 *** | 1.51 *** | 1.50 *** | 1.52 *** | 1.39 *** | 0.99     | 2.22 *** | 1.33 *** | 1.74 *** |
| Migrants prior to 2004                    | 0.96     | 0.96     | 0.96     | 0.96     | 0.96     | 0.96     | 0.96     | 0.96     | 0.93     | 0.93     | 0.98     | 0.91 +   | 1.04     |
| Rural location                            | 1.08     | 1.08     | 1.08     | 1.08     | 1.08     | 1.08     | 1.08     | 1.19 +   | 0.54     | 1.16     | 1.29     | 0.89     | 1.50 *   |
| Year                                      | 1.16     | 1.17     | 1.17     | 1.05     | 1.03     |          | 1.23     | 1.15     | 1.18     | 1.07     | 1.25     | 1.08     | 1.27     |
| Year squared                              | 0.94 *   | 0.94 *   | 0.93 *   | 0.97 +   | 0.97     |          | 0.92 **  | 0.94 +   | 0.92 +   | 0.95 +   | 0.93     | 0.97     | 0.91 **  |

Results from negative binomial regressions at the household-year level of the number of departed migrants. Missing indicators and fixed effects are included but not shown.

+ p<0.10, \* p<0.05, \*\* p<0.01, \*\*\* p<0.001

**Supplement Table 4.** Full results for Nigeria by specification (incident rate ratios and significance tests).

| Predictor                                 | A        | B        | C        | D        | E        | F        | G        | H        | I        | J        | K        | L        | M        |
|-------------------------------------------|----------|----------|----------|----------|----------|----------|----------|----------|----------|----------|----------|----------|----------|
| <b>Climate variables</b>                  |          |          |          |          |          |          |          |          |          |          |          |          |          |
| CRU anomalies, years 0-1, precipitation   | 1.30 +   |          |          |          |          | 0.70 *** | 0.66     | 1.29 +   | 1.53 *** | 1.34     | 1.29     | 1.37 +   | 1.29 +   |
| CRU anomalies, years 0-1, temperature     | 0.58     |          |          |          |          | 0.44 *   | 0.00 *   | 0.54     | 1.17     | 0.64     | 0.56     | 0.82     | 0.46     |
| CRU raw values, years 0-1, precipitation  |          | 1.14 *   | 1.11     |          |          |          |          |          |          |          |          |          |          |
| CRU raw values, years 0-1, temperature    |          | 0.83     | 0.79     |          |          |          |          |          |          |          |          |          |          |
| CRU raw values, years 0-1, precip. timing |          |          | 0.63     |          |          |          |          |          |          |          |          |          |          |
| MERRA anomalies, years 0-1, precipitation |          |          |          | 1.21 *   |          |          |          |          |          |          |          |          |          |
| MERRA anomalies, years 0-1, temperature   |          |          |          | 0.40 *** |          |          |          |          |          |          |          |          |          |
| CRU anomalies, years 0-3, precipitation   |          |          |          |          | 0.25 *** |          |          |          |          |          |          |          |          |
| CRU anomalies, years 0-3, temperature     |          |          |          |          | 0.06 *** |          |          |          |          |          |          |          |          |
| CRU anomalies, years 0-1, precip. squared |          |          |          |          |          |          | 1.10     |          |          |          |          |          |          |
| CRU anomalies, years 0-1, temp. squared   |          |          |          |          |          |          | 53.90 *  |          |          |          |          |          |          |
| CRU anomalies, years 0-1, precip. X temp. |          |          |          |          |          |          | 3.61 *** |          |          |          |          |          |          |
| <b>Controls</b>                           |          |          |          |          |          |          |          |          |          |          |          |          |          |
| Female                                    | 1.22 **  | 1.22 **  | 1.22 **  | 1.22 **  | 1.21 **  | 1.23 **  | 1.22 **  | 1.20 *   | 1.22     | 1.63 *** | 0.71 +   | 1.57 **  | 0.99     |
| Age                                       | 1.04     | 1.04     | 1.04     | 1.04     | 1.04     | 1.04     | 1.04     | 1.04     | 1.00     | 1.05 *   | 1.02     | 1.06 +   | 1.03     |
| Age squared                               | 1.00     | 1.00     | 1.00     | 1.00     | 1.00     | 1.00     | 1.00     | 1.00     | 1.00     | 1.00 *   | 1.00     | 1.00     | 1.00     |
| Born in rural area                        | 1.13     | 1.13     | 1.13     | 1.13     | 1.12     | 1.14     | 1.13     | 1.16     | 1.11     | 1.13     | 1.04     | 1.05     | 1.18     |
| Years of education                        | 1.00     | 1.00     | 1.00     | 1.00     | 1.00     | 1.00     | 1.00     | 0.98     | 1.17 *** | 1.02     | 0.99     | 1.07     | 0.96     |
| Years of education squared                | 1.00     | 1.00     | 1.00     | 1.00     | 1.00     | 1.00     | 1.00     | 1.00     | 0.99 **  | 1.00     | 1.00     | 1.00     | 1.00     |
| Primary sector occupation                 | 1.18     | 1.18     | 1.18     | 1.17     | 1.18     | 1.19     | 1.18     | 1.15     | 1.39     | 1.16     | 1.32     | 1.24     | 1.17     |
| Number of children (<15 years old)        | 1.08 **  | 1.08 **  | 1.08 **  | 1.08 **  | 1.08 **  | 1.08 **  | 1.08 **  | 1.09 **  | 0.98     | 1.05 *   | 1.14 **  | 0.99     | 1.15 *** |
| Number of adult men                       | 1.33 *** | 1.33 *** | 1.32 *** | 1.33 *** | 1.32 *** | 1.33 *** | 1.33 *** | 1.35 *** | 1.22 *** | 1.59 *** | 0.91 +   | 1.55 *** | 1.16 *** |
| Number of adult women                     | 1.27 *** | 1.27 *** | 1.27 *** | 1.27 *** | 1.27 *** | 1.28 *** | 1.27 *** | 1.27 *** | 1.27 *** | 0.96     | 1.86 *** | 1.13     | 1.39 *** |
| Migrants prior to 2004                    | 0.99     | 0.99     | 0.99     | 0.99     | 0.99     | 1.00     | 0.99     | 1.01     | 0.86     | 0.92     | 1.10     | 0.87 *   | 1.10 +   |
| Rural location                            | 0.95     | 0.95     | 0.95     | 0.96     | 0.95     | 0.95     | 0.95     | 0.93     | 0.94     | 0.95     | 1.08     | 1.25     | 0.82     |
| Year                                      | 4.61 *** | 4.71 *** | 4.92 *** | 6.34 *** | 3.92 *** |          | 6.10 *** | 4.50 *** | 7.18 *** | 5.55 *** | 3.86 *** | 5.84 *** | 4.54 *** |
| Year squared                              | 0.77 *** | 0.77 *** | 0.76 *** | 0.75 *** | 0.75 *** |          | 0.74 *** | 0.77 *** | 0.73 *** | 0.75 *** | 0.78 *** | 0.76 *** | 0.75 *** |

Results from negative binomial regressions at the household-year level of the number of departed migrants. Missing indicators and fixed effects are included but not shown.

+ p<0.10, \* p<0.05, \*\* p<0.01, \*\*\* p<0.001

**Supplement Table 5.** Full results for Burkina Faso by specification (incident rate ratios and significance tests).

| Predictor                                 | A        | B        | C        | D        | E        | F        | G        | H        | I        | J        | K        | L        | M        |          |
|-------------------------------------------|----------|----------|----------|----------|----------|----------|----------|----------|----------|----------|----------|----------|----------|----------|
| <b>Climate variables</b>                  |          |          |          |          |          |          |          |          |          |          |          |          |          |          |
| CRU anomalies, years 0-1, precipitation   | 0.79     |          |          |          |          | 0.60 +   | 0.79     | 1.20     | 0.55 **  | 0.76     | 0.96     | 0.79     | 0.78     |          |
| CRU anomalies, years 0-1, temperature     | 0.29 *** |          |          |          |          | 0.69     | 0.20     | 0.49 *   | 0.19 *** | 0.30 *** | 0.20 *** | 0.31 *** | 0.24 **  |          |
| CRU raw values, years 0-1, precipitation  |          | 0.81     | 0.81     |          |          |          |          |          |          |          |          |          |          |          |
| CRU raw values, years 0-1, temperature    |          | 0.74 *** | 0.74 *** |          |          |          |          |          |          |          |          |          |          |          |
| CRU raw values, years 0-1, precip. timing |          |          | 0.92     |          |          |          |          |          |          |          |          |          |          |          |
| MERRA anomalies, years 0-1, precipitation |          |          |          | 0.64 **  |          |          |          |          |          |          |          |          |          |          |
| MERRA anomalies, years 0-1, temperature   |          |          |          | 0.51 *** |          |          |          |          |          |          |          |          |          |          |
| CRU anomalies, years 0-3, precipitation   |          |          |          |          | 0.50 +   |          |          |          |          |          |          |          |          |          |
| CRU anomalies, years 0-3, temperature     |          |          |          |          | 0.14 *** |          |          |          |          |          |          |          |          |          |
| CRU anomalies, years 0-1, precip. squared |          |          |          |          |          |          | 1.24     |          |          |          |          |          |          |          |
| CRU anomalies, years 0-1, temp. squared   |          |          |          |          |          |          | 1.47     |          |          |          |          |          |          |          |
| CRU anomalies, years 0-1, precip. X temp. |          |          |          |          |          |          | 0.79     |          |          |          |          |          |          |          |
| <b>Controls</b>                           |          |          |          |          |          |          |          |          |          |          |          |          |          |          |
| Female                                    | 1.30     | 1.30     | 1.30     | 1.30     | 1.31     | 1.31     | 1.31     | 1.38     | 1.17     | 1.24     | 0.69     | 1.29     | 0.98     |          |
| Age                                       | 1.06 **  | 1.06 **  | 1.06 **  | 1.06 **  | 1.06 **  | 1.06 **  | 1.06 **  | 1.05 **  | 1.08 *   | 1.05 *   | 1.25 *** | 1.03     | 1.21 *** |          |
| Age squared                               | 1.00 *   | 1.00 *   | 1.00 *   | 1.00 *   | 1.00 *   | 1.00 *   | 1.00 *   | 1.00 *   | 1.00 *   | 1.00 +   | 1.00 *** | 1.00     | 1.00 *** |          |
| Born in rural area                        | 0.62 *   | 0.62 *   | 0.62 *   | 0.62 *   | 0.62 *   | 0.63 *   | 0.62 *   | 0.44 *** | 0.88     | 0.61 *   | 0.76     | 0.61 *   | 0.66     |          |
| Years of education                        | 1.14 **  | 1.14 **  | 1.14 *** | 1.14 **  | 1.14 *** | 1.14 **  | 1.14 **  | 1.15 *** | 1.15 *   | 1.17 *** | 1.02     | 1.17 **  | 1.10 *   |          |
| Years of education squared                | 0.99 *   | 0.99 *   | 0.99 *   | 0.99 *   | 0.99 *   | 0.99 *   | 0.99 *   | 0.99 *   | 0.98 +   | 0.98 **  | 1.01     | 0.98 *   | 1.00     |          |
| Primary sector occupation                 | 1.50     | 1.50     | 1.50     | 1.50     | 1.50     | 1.48     | 1.49     | 1.25     | 1.63     | 1.39     | 2.30     | 1.47     | 1.53     |          |
| Number of children (<15 years old)        | 1.04     | 1.04     | 1.04     | 1.04     | 1.04     | 1.04     | 1.04     | 1.00     | 1.06 +   | 1.05     | 1.01     | 1.03     | 1.07 *   |          |
| Number of adult men                       | 1.54 *** | 1.54 *** | 1.54 *** | 1.54 *** | 1.54 *** | 1.54 *** | 1.54 *** | 1.38 *** | 1.68 *** | 1.60 *** | 0.95     | 1.61 *** | 1.21 *   |          |
| Number of adult women                     | 1.00     | 1.00     | 1.00     | 1.00     | 1.00     | 1.00     | 1.00     | 1.04     | 0.99     | 0.94     | 1.54 *** | 0.98     | 1.12     |          |
| Migrants prior to 2004                    | 1.07 *   | 1.07 *   | 1.07 *   | 1.08 *   | 1.07 *   | 1.07 *   | 1.07 *   | 0.96     | 1.13 *** | 1.06 *   | 1.19     | 1.08 **  | 1.05     |          |
| Rural location                            | 1.28     | 1.28     | 1.28     | 1.29     | 1.29     | 1.29     | 1.29     | 0.91     | 1.95 **  | 1.29     | 1.69     | 1.22     | 1.97     |          |
| Year                                      | 3.34 *** | 3.23 *** | 3.22 *** | 4.19 *** | 4.34 *** |          |          | 3.53 *** | 3.20 *** | 3.32 *** | 3.27 *** | 3.99 **  | 3.47 *** | 2.86 *** |
| Year squared                              | 0.84 *** | 0.84 *** | 0.84 *** | 0.82 *** | 0.78 *** |          |          | 0.83 *** | 0.84 *** | 0.85 *** | 0.84 *** | 0.83 *   | 0.83 *** | 0.86 **  |

Results from negative binomial regressions at the household-year level of the number of departed migrants. Missing indicators and fixed effects are included but not shown.

+ p<0.10, \* p<0.05, \*\* p<0.01, \*\*\* p<0.001

**Supplement Table 6.** Full results for Senegal by specification (incident rate ratios and significance tests).

| <b>Predictor</b>                          | <b>A</b> | <b>B</b> | <b>C</b> | <b>D</b> | <b>E</b> | <b>F</b> | <b>G</b> | <b>H</b> | <b>I</b> | <b>J</b> | <b>K</b> | <b>L</b> | <b>M</b> |
|-------------------------------------------|----------|----------|----------|----------|----------|----------|----------|----------|----------|----------|----------|----------|----------|
| <b>Climate variables</b>                  |          |          |          |          |          |          |          |          |          |          |          |          |          |
| CRU anomalies, years 0-1, precipitation   | 0.95     |          |          |          |          | 1.10     | 1.14     | 0.84     | 1.05     | 1.02     | 0.74 +   | 0.94     | 0.97     |
| CRU anomalies, years 0-1, temperature     | 1.14     |          |          |          |          | 1.46     | 5.74     | 0.86     | 1.81     | 1.14     | 1.20     | 1.12     | 1.18     |
| CRU raw values, years 0-1, precipitation  |          | 0.99     | 1.03     |          |          |          |          |          |          |          |          |          |          |
| CRU raw values, years 0-1, temperature    |          | 1.01     | 1.01     |          |          |          |          |          |          |          |          |          |          |
| CRU raw values, years 0-1, precip. timing |          |          | 0.57 +   |          |          |          |          |          |          |          |          |          |          |
| MERRA anomalies, years 0-1, precipitation |          |          |          | 0.91     |          |          |          |          |          |          |          |          |          |
| MERRA anomalies, years 0-1, temperature   |          |          |          | 1.00     |          |          |          |          |          |          |          |          |          |
| CRU anomalies, years 0-3, precipitation   |          |          |          |          | 1.35     |          |          |          |          |          |          |          |          |
| CRU anomalies, years 0-3, temperature     |          |          |          |          | 1.75     |          |          |          |          |          |          |          |          |
| CRU anomalies, years 0-1, precip. squared |          |          |          |          |          |          | 0.93     |          |          |          |          |          |          |
| CRU anomalies, years 0-1, temp. squared   |          |          |          |          |          |          | 0.33 +   |          |          |          |          |          |          |
| CRU anomalies, years 0-1, precip. X temp. |          |          |          |          |          |          | 0.93     |          |          |          |          |          |          |
| <b>Controls</b>                           |          |          |          |          |          |          |          |          |          |          |          |          |          |
| Female                                    | 1.34 +   | 1.34 +   | 1.34 +   | 1.34 +   | 1.34 +   | 1.34 +   | 1.34 +   | 1.52 +   | 1.11     | 1.24     | 0.89     | 1.20     | 1.28     |
| Age                                       | 1.01     | 1.01     | 1.01     | 1.01     | 1.01     | 1.01     | 1.01     | 1.06     | 0.97     | 0.99     | 1.12     | 0.98     | 1.08     |
| Age squared                               | 1.00     | 1.00     | 1.00     | 1.00     | 1.00     | 1.00     | 1.00     | 1.00     | 1.00     | 1.00     | 1.00     | 1.00     | 1.00     |
| Born in rural area                        | 1.21     | 1.21     | 1.21     | 1.21     | 1.21     | 1.21     | 1.21     | 1.63 +   | 0.86     | 1.13     | 1.00     | 1.09     | 1.22     |
| Years of education                        | 1.01     | 1.01     | 1.01     | 1.01     | 1.01     | 1.01     | 1.01     | 1.01     | 1.01     | 1.00     | 0.95     | 1.04     | 0.98     |
| Years of education squared                | 1.00     | 1.00     | 1.00     | 1.00     | 1.00     | 1.00     | 1.00     | 1.00     | 1.00     | 1.00     | 1.01     | 1.00     | 1.01     |
| Primary sector occupation                 | 1.45     | 1.45     | 1.45     | 1.45     | 1.45     | 1.45     | 1.45     | 1.76     | 1.00     | 1.24     | 2.26     | 1.39     | 1.39     |
| Number of children (<15 years old)        | 0.96 *   | 0.96 *   | 0.96 *   | 0.96 *   | 0.96 *   | 0.96 *   | 0.96 *   | 0.94 *** | 1.00     | 0.98     | 0.91 +   | 0.96 +   | 1.00     |
| Number of adult men                       | 1.30 *** | 1.30 *** | 1.30 *** | 1.30 *** | 1.30 *** | 1.30 *** | 1.30 *** | 1.35 *** | 1.23 *** | 1.46 *** | 0.76 +   | 1.42 *** | 0.97     |
| Number of adult women                     | 1.17 *** | 1.17 *** | 1.17 *** | 1.17 *** | 1.17 *** | 1.17 *** | 1.17 *** | 1.18 *** | 1.15 **  | 1.02     | 1.87 *** | 1.11 **  | 1.38 *** |
| Migrants prior to 2004                    | 1.00     | 1.00     | 1.00     | 1.00     | 1.00     | 1.00     | 1.00     | 1.03     | 0.99     | 0.92     | 1.25 **  | 0.91     | 1.23 **  |
| Rural location                            | 1.02     | 1.02     | 1.02     | 1.03     | 1.03     | 1.02     | 1.02     | 0.92     | 1.19     | 1.12     | 0.95     | 1.22     | 0.58     |
| Year                                      | 1.45 +   | 1.48 +   | 1.46 +   | 1.48 *   | 1.31     |          | 1.36     | 1.78 *   | 1.05     | 1.45     | 1.43     | 1.50     | 1.32     |
| Year squared                              | 0.92 *   | 0.92 *   | 0.92 *   | 0.92 **  | 0.95     |          | 0.93 +   | 0.88 **  | 0.99     | 0.92 *   | 0.91     | 0.91 *   | 0.93     |

Results from negative binomial regressions at the household-year level of the number of departed migrants. Missing indicators and fixed effects are included but not shown.

+ p<0.10, \* p<0.05, \*\* p<0.01, \*\*\* p<0.001

## **FIGURE LEGENDS**

Supplement Figure 1. Map of the sample areas.

Supplement Figure 2. Nonlinear effects of precipitation on migration.



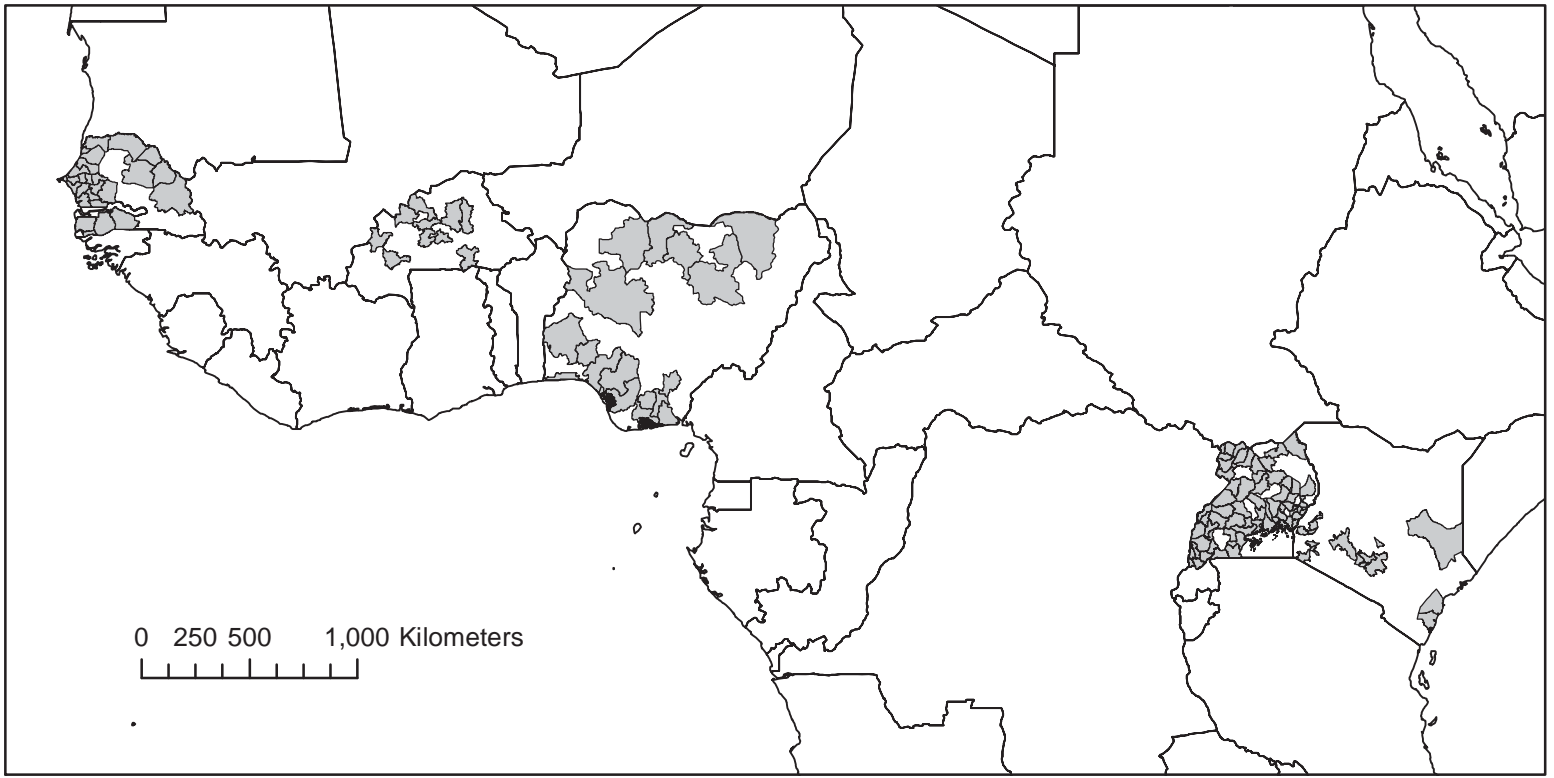

### Uganda

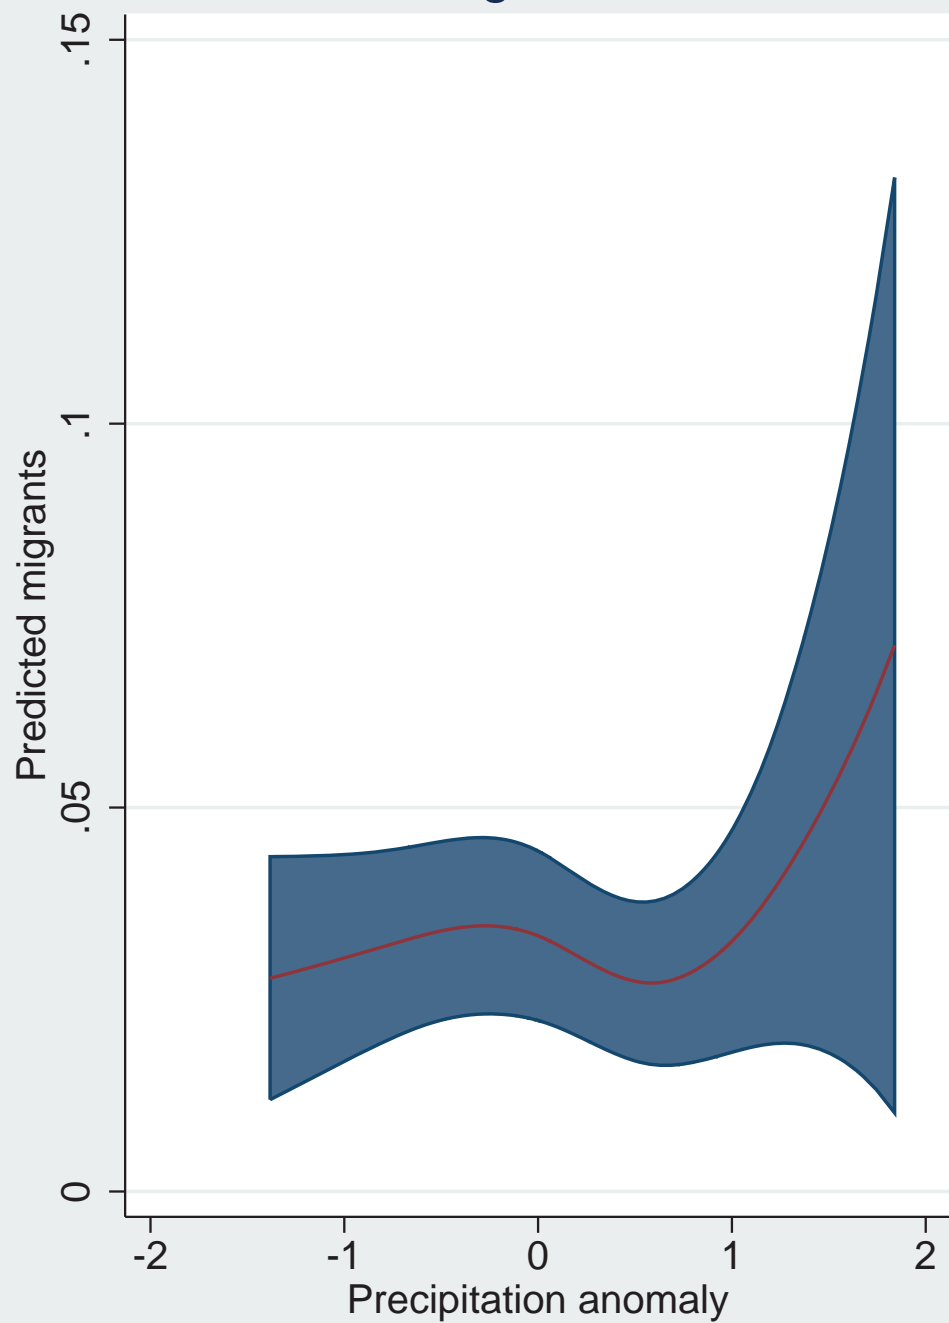

### Nigeria

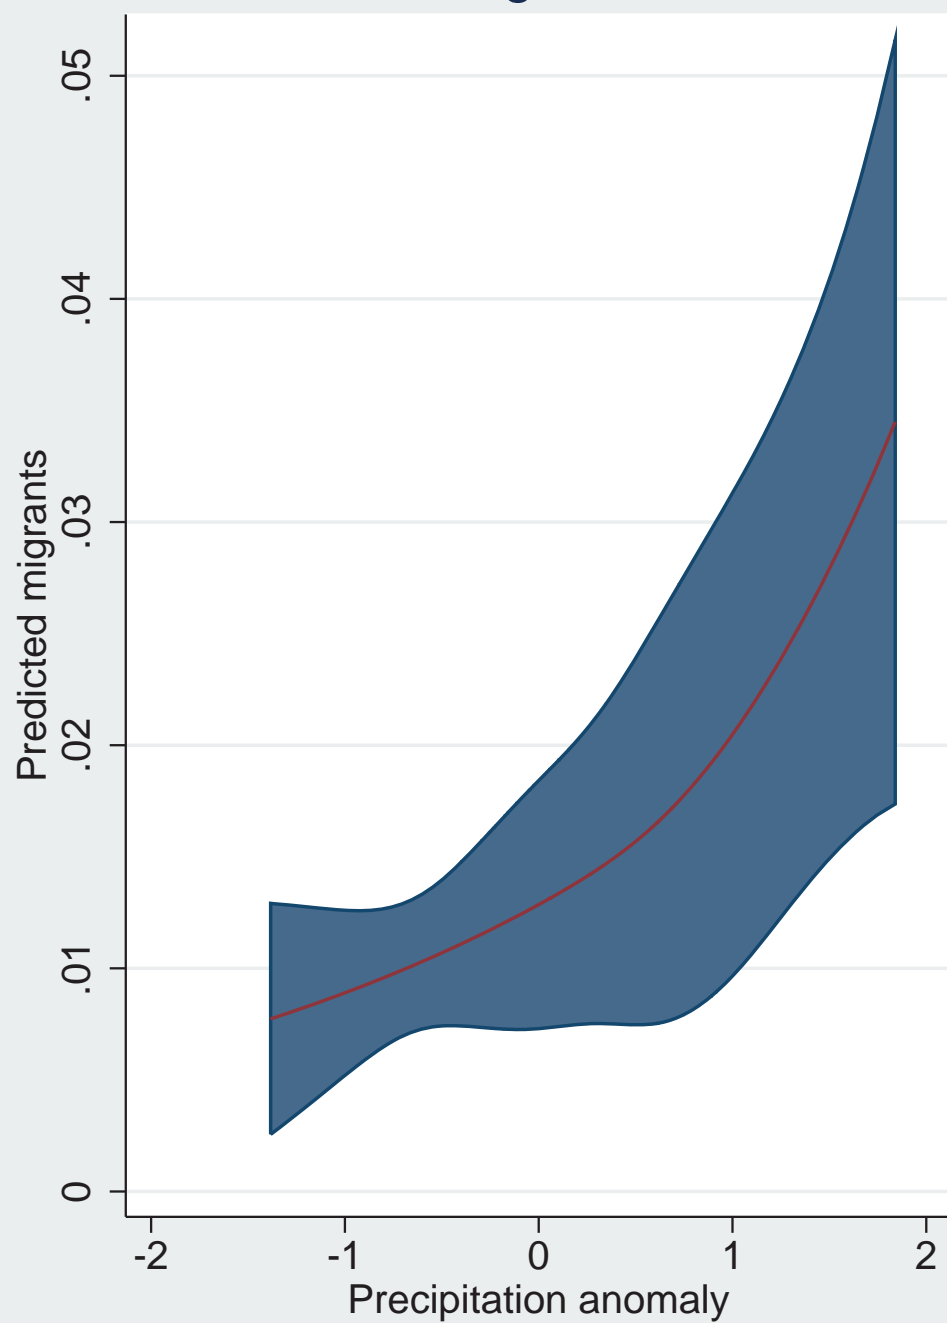

Supplement: NIHMS750718-supplement-10584_2015_1592_MOESM1_ESM.pdf [file NIHMS750718-supplement-10584_2015_1592_MOESM1_ESM.pdf]
